# Supplementary material for: Development of a UK core dataset for geriatric medicine research: a position statement and results from a Delphi consensus process
Source: Springer Nature journal article supplement (doi:10.1186/s12877-023-03805-5), 2023-03-23
Supplement: MOESM4 [file 24666984]

Template case report form – Geriatric medicine core dataset V1.0

Demographics

|                                               |                         |                       |                       |                        |
|-----------------------------------------------|-------------------------|-----------------------|-----------------------|------------------------|
| Age                                           | _____                   |                       |                       |                        |
| Gender (circle)                               | Male                    |                       | Female                |                        |
| Ethnicity (circle)                            | White British           | White Irish           |                       | White Other            |
|                                               | White & Black Caribbean | White & Black African | White & Asian         | Other mixed background |
|                                               | Indian                  | Bangladeshi           | Pakistani             | Other Asian background |
|                                               | Caribbean               |                       | African               | Black other            |
|                                               | Chinese                 | Other (specify)       |                       |                        |
| Place of residence (circle)                   | Independent living      | Additional care       | Residential care home | Nursing home           |
| Socioeconomic decile (calculate for postcode) |                         |                       |                       |                        |

---

Multi-morbidity

|                  |     |                            |     |
|------------------|-----|----------------------------|-----|
| IHD including MI | Y/N | Congestive cardiac failure | Y/N |
| Dementia         | Y/N | COPD                       | Y/N |
| Stroke           | Y/N | Parkinsonian syndrome      | Y/N |
| Diabetes         | Y/N | Hypertension               | Y/N |
| Active cancer    | Y/N | Depression                 | Y/N |

Count \_\_\_\_\_

---

Medications

Please list all medications below:

---

Medication Count \_\_\_\_\_

Template case report form – Geriatric medicine core dataset V1.0

Barthel Index

Please circle the most appropriate responses

|            | 0                                                        | 1                                           | 2                               | 3                          |
|------------|----------------------------------------------------------|---------------------------------------------|---------------------------------|----------------------------|
| Bowels     | Incontinent                                              | Occasional accident                         | Continent                       |                            |
| Bladder    | Incontinent (or catheter unable to manage independently) | Occasional accident (max once per 24 hours) | Continent (over 7-day period)   |                            |
| Grooming   | Needs help with personal care                            | Independent face/hair/teeth/shaving         |                                 |                            |
| Toilet Use | Dependent                                                | Needs some help                             | Independent                     |                            |
| Feeding    | Unable                                                   | Needs help e.g. cutting                     | Independent                     |                            |
| Transfers  | Unable – no sitting balance                              | Major help but can sit                      | Minor help (physical or verbal) | Independent                |
| Mobility   | Immobile                                                 | Wheelchair independent                      | Walks with help of one person   | Independent (may use aids) |
| Dressing   | Dependent                                                | Needs help, can do about half               | Independent                     |                            |
| Stairs     | Unable                                                   | Needs help                                  | Independent                     |                            |
| Bathing    | Dependent                                                | Independent                                 |                                 |                            |

Barthel Index Score \_\_\_\_\_

Template case report form – Geriatric medicine core dataset V1.0

Nottingham Extended Activities of Daily Living

This should be completed according to the activities that the participant has actually done over the last four weeks. Please tick the most appropriate responses.

|                                           | 0          |           | 1                      |        |
|-------------------------------------------|------------|-----------|------------------------|--------|
|                                           | Not at all | With help | On own with difficulty | On own |
| Walk around outside?                      |            |           |                        |        |
| Climb stairs?                             |            |           |                        |        |
| Get in and out of car?                    |            |           |                        |        |
| Walk over uneven ground?                  |            |           |                        |        |
| Cross roads?                              |            |           |                        |        |
| Travel on public transport?               |            |           |                        |        |
| Manage to feed yourself?                  |            |           |                        |        |
| Make a hot drink?                         |            |           |                        |        |
| Take hot drinks from one room to another? |            |           |                        |        |
| Do the washing up?                        |            |           |                        |        |
| Make a hot snack?                         |            |           |                        |        |
| Manage your own money?                    |            |           |                        |        |
| Wash small items of clothing?             |            |           |                        |        |
| Do your own housework?                    |            |           |                        |        |
| Do your own shopping?                     |            |           |                        |        |
| Do a full clothes wash?                   |            |           |                        |        |
| Read newspapers or books?                 |            |           |                        |        |
| Use the telephone?                        |            |           |                        |        |
| Write letters? ( <u>or emails</u> )       |            |           |                        |        |
| Go out socially?                          |            |           |                        |        |
| Manage your own garden?                   |            |           |                        |        |
| Drive a car?                              |            |           |                        |        |

NEADL Score \_\_\_\_\_

Template case report form – Geriatric medicine core dataset V1.0

Cognition

Assessment Used \_\_\_\_\_

Score \_\_\_\_\_

Clinical Frailty Scale

| Level of fitness/<br>frailty    | Description                                                                                                                                               | Number (circle best fitting<br>level) |
|---------------------------------|-----------------------------------------------------------------------------------------------------------------------------------------------------------|---------------------------------------|
| Very fit                        | Robust, active, energetic and motivated; commonly exercise regularly                                                                                      | 1                                     |
| Well                            | No active disease symptoms but less fit than above; exercise often or active occasionally e.g. seasonally                                                 | 2                                     |
| Managing well                   | Medical problems are well controlled but not regularly active beyond routine walking                                                                      | 3                                     |
| Living with very mild frailty   | Not dependent on others for daily help but often symptoms limit activities; common complaint is being "slowed-up" or tired during the day                 | 4                                     |
| Living with mild frailty        | More evident slowing; need help with high order IADLs; typically progressively impairs shopping and walking outside alone, meal preparation and housework | 5                                     |
| Living with moderate frailty    | Need help with all outside activities; often have problems with stairs and need help with bathing and might need minimal assistance with dressing         | 6                                     |
| Living with severe frailty      | Completely dependent for personal care; seem stable and not at high risk of dying within 6 months                                                         | 7                                     |
| Living with very severe frailty | Completely dependent, approaching the end of life; typically, could not recover from a minor illness                                                      | 8                                     |
| Terminally ill                  | Life expectancy < 6 months but not otherwise evidently frail                                                                                              | 9                                     |
