# Supplementary material for: Development of a UK core dataset for geriatric medicine research: a position statement and results from a Delphi consensus process
Source: Springer Nature journal article supplement (doi:10.1186/s12877-023-03805-5), 2023-03-23
Supplement: MOESM5 [file 24666984]

Template case report form – Geriatric medicine extended dataset V1.0

Demographics

|                                   |                                                          |                     |                                                               |                                                             |
|-----------------------------------|----------------------------------------------------------|---------------------|---------------------------------------------------------------|-------------------------------------------------------------|
| Biological sex (circle)           | Male                                                     |                     | Female                                                        |                                                             |
| Religion (circle)                 | No religion                                              |                     | Catholic                                                      |                                                             |
|                                   | Church of England                                        | Church of Scotland  | Church of Ireland                                             | Free presbyterian                                           |
|                                   | Methodist                                                | Baptist             | Protestant – Other                                            | Christian – Other                                           |
|                                   | Buddhist                                                 |                     | Hindu                                                         | Jewish                                                      |
|                                   | Muslim                                                   |                     | Sikh                                                          | Other                                                       |
|                                   | Prefer not to say                                        |                     |                                                               |                                                             |
| Highest education (circle)        | Higher education and professional/vocational equivalents |                     | A levels, vocational level 3, and equivalents                 | GCSE/O level grade A*-C, vocational level 2 and equivalents |
|                                   | Qualifications at level 1 and below                      |                     | Other qualifications: level unknown (including international) | No qualifications                                           |
|                                   | Prefer not to say                                        |                     |                                                               |                                                             |
| Sexual orientation (circle)       | Heterosexual (straight)                                  | Gay/ Lesbian        | Bisexual                                                      | Other                                                       |
|                                   | Prefer not to say                                        |                     |                                                               |                                                             |
| Self-declared disability (circle) | None                                                     | Physical disability | Cognitive disability                                          | Physical and cognitive disability                           |
|                                   | Prefer not to say                                        |                     |                                                               |                                                             |

---

Cumulative Illness Rating Scale – Geriatric (CIRS-G)

|               |                                                                                                                                                                |                             |
|---------------|----------------------------------------------------------------------------------------------------------------------------------------------------------------|-----------------------------|
| Heart         | No problem                                                                                                                                                     | 0 <input type="checkbox"/>  |
|               | MI >5 years ago, occasional angina treated with meds as needed                                                                                                 | +1 <input type="checkbox"/> |
|               | CHF compensated with meds, daily antianginal meds, left ventricular hypertrophy, atrial fibrillation, bundle branch block, daily antiarrhythmic drugs          | +2 <input type="checkbox"/> |
|               | MI ≤5 years ago, abnormal stress test, or past PTCA or CABG                                                                                                    | +3 <input type="checkbox"/> |
|               | Marked activity restriction secondary to cardiac status (i.e., unstable angina or intractable CHF)                                                             | +4 <input type="checkbox"/> |
| Vascular      | No problem                                                                                                                                                     | 0 <input type="checkbox"/>  |
|               | Hypertension compensated with salt restriction and weight loss, cholesterol >200 mg/dL                                                                         | +1 <input type="checkbox"/> |
|               | Daily antihypertensive meds, one symptom of atherosclerotic disease (angina, claudication, bruit, amaurosis fugax, absent pedal pulses), aortic aneurysm <4 cm | +2 <input type="checkbox"/> |
|               | ≥2 symptoms of atherosclerosis                                                                                                                                 | +3 <input type="checkbox"/> |
|               | Previous vascular surgery, aortic aneurysm ≥4 cm                                                                                                               | +4 <input type="checkbox"/> |
| Hematopoietic | No problem                                                                                                                                                     | 0 <input type="checkbox"/>  |
|               | Hemoglobin: females 10-12 g/dL, males 12-14 g/dL, anemia of chronic disease                                                                                    | +1 <input type="checkbox"/> |

Template case report form – Geriatric medicine extended dataset V1.0

|                                      |                                                                                                                                                                     |                             |
|--------------------------------------|---------------------------------------------------------------------------------------------------------------------------------------------------------------------|-----------------------------|
|                                      | Hemoglobin: females 8 to <10 g/dL, males 10 to <12 g/dL, anemia secondary to iron/vitamin B-12/folate deficiency or chronic renal failure, total WBC 2,000-4,000    | +2 <input type="checkbox"/> |
|                                      | Hemoglobin: females <8 g/dL, males <10 g/dL, total WBC <2,000                                                                                                       | +3 <input type="checkbox"/> |
|                                      | Any leukemia or lymphoma                                                                                                                                            | +4 <input type="checkbox"/> |
| Respiratory                          | No problem                                                                                                                                                          | 0 <input type="checkbox"/>  |
|                                      | Recurrent episodes of acute bronchitis, current treated asthma with inhalers as needed, cigarette smoker 10-20 pack years                                           | +1 <input type="checkbox"/> |
|                                      | X-ray evidence of COPD, requires daily theophylline or inhalers, treated for pneumonia two or more times in the past 5 years, smoked 21-40 pack years               | +2 <input type="checkbox"/> |
|                                      | Limited ambulation secondary to limited respiratory capacity, requires oral steroids for lung disease, smoked >40 pack years                                        | +3 <input type="checkbox"/> |
|                                      | Requires supplemental oxygen, $\geq 1$ episode of respiratory failure requiring assisted ventilation, any lung cancer                                               | +4 <input type="checkbox"/> |
| Eyes, ears, nose, throat, and larynx | No problem                                                                                                                                                          | 0 <input type="checkbox"/>  |
|                                      | Corrected vision 20/40, chronic sinusitis, mild hearing loss                                                                                                        | +1 <input type="checkbox"/> |
|                                      | Corrected vision 20/60 or reads newsprint with difficulty, requires hearing aid, chronic sinonasal complaints requiring medication, requires medication for vertigo | +2 <input type="checkbox"/> |
|                                      | Partially blind (requires an escort to venture out), unable to read newsprint, conversational hearing still impaired with hearing aid                               | +3 <input type="checkbox"/> |
|                                      | Functional blindness, functional deafness, laryngectomy, requires surgical intervention for vertigo                                                                 | +4 <input type="checkbox"/> |
| Upper GI                             | No problem                                                                                                                                                          | 0 <input type="checkbox"/>  |
|                                      | Hiatal hernia, heartburn complaints treated with as-needed meds                                                                                                     | +1 <input type="checkbox"/> |
|                                      | Needs daily H <sub>2</sub> blocker or antacid, documented gastric or duodenal ulcer within 5 years                                                                  | +2 <input type="checkbox"/> |
|                                      | Active ulcer, guaiac positive stools, any swallowing disorder or dysphagia                                                                                          | +3 <input type="checkbox"/> |
|                                      | Gastric cancer, history of perforated ulcer, melena or hematochezia from upper GI source                                                                            | +4 <input type="checkbox"/> |
| Lower GI                             | No problem                                                                                                                                                          | 0 <input type="checkbox"/>  |
|                                      | Constipation managed with meds as needed, active hemorrhoids, status post hernia repair                                                                             | +1 <input type="checkbox"/> |
|                                      | Requires daily bulk laxatives or stool softeners, diverticulosis, untreated hernia                                                                                  | +2 <input type="checkbox"/> |
|                                      | Bowel impaction in the past year, daily use of stimulant laxatives or enemas                                                                                        | +3 <input type="checkbox"/> |
|                                      | Hematochezia from lower GI source, currently impacted, diverticulitis flare up, status post bowel obstruction, bowel carcinoma                                      | +4 <input type="checkbox"/> |
| Liver, pancreas, and biliary         | No problem                                                                                                                                                          | 0 <input type="checkbox"/>  |
|                                      | History of hepatitis >5 years ago, cholecystectomy                                                                                                                  | +1 <input type="checkbox"/> |
|                                      | Mildly elevated LFTs ( $\leq 150\%$ of normal), hepatitis within 5 years, cholelithiasis, daily or heavy alcohol use within 5 years                                 | +2 <input type="checkbox"/> |

Template case report form – Geriatric medicine extended dataset V1.0

|                          |                                                                                                                                                                                                                 |                             |
|--------------------------|-----------------------------------------------------------------------------------------------------------------------------------------------------------------------------------------------------------------|-----------------------------|
|                          | Elevated bilirubin (total >2 mg/dL), marked elevation of LFTs (>150% of normal), requires supplemental pancreatic enzymes for digestion                                                                         | +3 <input type="checkbox"/> |
|                          | Clinical or lab evidence of biliary obstruction, any biliary tree carcinoma, cholecystitis, pancreatitis, active hepatitis                                                                                      | +4 <input type="checkbox"/> |
| Renal                    | No problem                                                                                                                                                                                                      | 0 <input type="checkbox"/>  |
|                          | Kidney stone passage within the past 10 years or asymptomatic kidney stone, pyelonephritis within 5 years                                                                                                       | +1 <input type="checkbox"/> |
|                          | Serum creatinine 1.5-3.0 mg/dL without diuretic or antihypertensive medication                                                                                                                                  | +2 <input type="checkbox"/> |
|                          | Serum creatinine >3.0 mg/dL OR serum creatinine >1.5 mg/dL on diuretic, antihypertensive, or bicarbonate therapy, current pyelonephritis                                                                        | +3 <input type="checkbox"/> |
|                          | Requires dialysis, renal carcinoma                                                                                                                                                                              | +4 <input type="checkbox"/> |
| Genitourinary            | No problem                                                                                                                                                                                                      | 0 <input type="checkbox"/>  |
|                          | Stress incontinence, hysterectomy, BPH without urinary symptoms                                                                                                                                                 | +1 <input type="checkbox"/> |
|                          | Abnormal pap smear, frequent UTIs ( $\geq 3$ in past year), urinary incontinence (non-stress) in females, BPH with hesitancy or frequency, current UTI, any urinary diversion procedure, status post TURP       | +2 <input type="checkbox"/> |
|                          | Prostate cancer in situ (i.e., found incidentally during TURP), vaginal bleeding, cervical carcinoma in situ, hematuria, status post urosepsis in past year                                                     | +3 <input type="checkbox"/> |
|                          | Acute urinary retention, any GU carcinoma except as above                                                                                                                                                       | +4 <input type="checkbox"/> |
| Musculoskeletal and skin | No problem                                                                                                                                                                                                      | 0 <input type="checkbox"/>  |
|                          | Uses meds as needed for arthritis or has mildly limited activities of daily living (ADLs) from joint pathology, excised non-melanoma skin cancers, skin infections requiring antibiotics within a year          | +1 <input type="checkbox"/> |
|                          | Daily antiarthritic meds or use of assistive devices or moderate limitation in ADLs, daily meds for chronic skin conditions, melanoma without metastasis                                                        | +2 <input type="checkbox"/> |
|                          | Severely impaired ADLs secondary to arthritis, requires steroids for arthritic condition, vertebral compression fractures from osteoporosis                                                                     | +3 <input type="checkbox"/> |
|                          | Wheelchair bound, severe joint deformity or severely impaired usage, osteomyelitis, any bone or muscle carcinoma, metastatic melanoma                                                                           | +4 <input type="checkbox"/> |
|                          |                                                                                                                                                                                                                 |                             |
| Neurologic               | No problem                                                                                                                                                                                                      | 0 <input type="checkbox"/>  |
|                          | Frequent headaches requiring meds as needed without interference with daily activities, history of TIA phenomena (at least one)                                                                                 | +1 <input type="checkbox"/> |
|                          | Requires daily meds for chronic headaches or headaches that regularly interfere with daily activities, status post CVA without significant residual, mild neurodegenerative disease (Parkinson's, MS, ALS, etc) | +2 <input type="checkbox"/> |
|                          | Status post CVA with mild residual dysfunction, any CNS neurosurgical procedure, moderate neurodegenerative disease                                                                                             | +3 <input type="checkbox"/> |
|                          | Status post CVA with mild residual dysfunction, any CNS neurosurgical procedure, moderate neurodegenerative disease                                                                                             | +4 <input type="checkbox"/> |
|                          |                                                                                                                                                                                                                 |                             |
| Endocrine and breast     | No problem                                                                                                                                                                                                      | 0 <input type="checkbox"/>  |
|                          | Diabetes mellitus compensated with diet, obesity (BMI >30), requires thyroid hormone replacement                                                                                                                | +1 <input type="checkbox"/> |

Template case report form – Geriatric medicine extended dataset V1.0

|                     |                                                                                                                                                                                                                                                                                                      |                             |
|---------------------|------------------------------------------------------------------------------------------------------------------------------------------------------------------------------------------------------------------------------------------------------------------------------------------------------|-----------------------------|
|                     | Diabetes mellitus requiring insulin or oral agents, fibrocystic breast disease                                                                                                                                                                                                                       | +2 <input type="checkbox"/> |
|                     | Any electrolyte disturbance requiring hospital treatment, morbid obesity (BMI >45)                                                                                                                                                                                                                   | +3 <input type="checkbox"/> |
|                     | Brittle or poorly controlled diabetes mellitus or diabetic coma in the past year, requires adrenal hormone replacement, adrenal, thyroid, or breast carcinoma                                                                                                                                        | +4 <input type="checkbox"/> |
| Psychiatric illness | No problem                                                                                                                                                                                                                                                                                           | 0 <input type="checkbox"/>  |
|                     | Minor psychiatric condition or history thereof: specifically, previous outpatient mental health treatment during a crisis, outpatient treatment for depression >10 years ago, current use of minor tranquilizers for episodic anxiety (occasional usage), mild early dementia                        | +1 <input type="checkbox"/> |
|                     | A history of major depression (by DSM) within the past 10 years (treated or untreated), mild dementia, any previous psychiatric hospitalization, any psychotic episode substance abuse history >10 years ago                                                                                         | +2 <input type="checkbox"/> |
|                     | Currently meets DSM criteria for major depression or two or more episodes of major depression in the past 10 years, moderate dementia, current usage of daily anti-anxiety medication, currently meets DSM criteria for substance abuse or dependency, requires daily antipsychotic medication       | +3 <input type="checkbox"/> |
|                     | Current mental illness requiring psychiatric hospitalization, institutionalization, or intensive outpatient management (e.g. patients with severe or suicidal depression, acute psychosis or psychotic decompensation, severe agitation from dementia, severe substance abuse, etc), severe dementia | +4 <input type="checkbox"/> |
|                     |                                                                                                                                                                                                                                                                                                      |                             |

**Total CIRS-G Score**

|  |  |
|--|--|
|  |  |
|--|--|

Template case report form – Geriatric medicine extended dataset V1.0

Handgrip strength

Device used: \_\_\_\_\_ Calibration date: \_\_\_\_\_

Position measurement performed (circle):      Sat in chair/      Semi-upright on bed or couch

Dominant arm (circle): Right/ Left

|       |    |      |
|-------|----|------|
| Right | 1. | Best |
|       | 2. |      |
|       | 3. |      |
| Left  | 1. | Best |
|       | 2. |      |
|       | 3. |      |

---

Walking speed

Course length: \_\_\_\_\_

Active walking for start:      Yes/      No      Active walking for stop: Yes/      No

Time taken: \_\_\_\_\_: \_\_\_\_\_ (sec: millisec)

---

Frailty Phenotype

Adapt according to research design and tool used to assess physical activity. The example given is taken from the Frailty Intervention Trial, and may be adjusted accordingly. Handgrip strength and walking speed should be recorded separately above, and the measures used to calculate the score below.

|                                                                                          |                                                                                     |              |                      |              |
|------------------------------------------------------------------------------------------|-------------------------------------------------------------------------------------|--------------|----------------------|--------------|
| Shrinking<br>(Score 1 if either yes)                                                     | 4.5kg weight loss over last year?                                                   |              | Yes                  | No           |
|                                                                                          | Over 5% loss of previous year's body weight on examination with scales              |              | Yes                  | No           |
| Weakness – handgrip strength (score 1 if below or equal to cut-offs)                     | BMI – Male                                                                          | Cutoff (kg)  | BMI - Female         | Cutoff (kg)  |
|                                                                                          | <=24                                                                                | <=29         | <=24                 | <=17         |
|                                                                                          | 24-26                                                                               | <=30         | 24-26                | <=17.3       |
|                                                                                          | 26-28                                                                               | <=30         | 26-28                | <=18         |
|                                                                                          | >28                                                                                 | <=32         | >28                  | <=21         |
| Self-reported exhaustion (score 1 if answers most or all of the time to either question) | How often over the last week have you felt that the following statements were true: |              |                      |              |
|                                                                                          | I felt that everything I did was an effort                                          |              | None of the time     |              |
|                                                                                          |                                                                                     |              | Some of the time     |              |
|                                                                                          |                                                                                     |              | Most of the time     |              |
|                                                                                          |                                                                                     |              | All of the time      |              |
|                                                                                          | I could not get going                                                               |              | None of the time     |              |
|                                                                                          |                                                                                     |              | Some of the time     |              |
|                                                                                          |                                                                                     |              | Most of the time     |              |
| All of the time                                                                          |                                                                                     |              |                      |              |
| Gait speed (score 1 if below or equal to cut-offs)                                       | Height (cm) – Male                                                                  | Cutoff (m/s) | Height (cm) – Female | Cutoff (m/s) |
|                                                                                          | <=173                                                                               | <=0.65       | <=159                | <=0.65       |
|                                                                                          | >173                                                                                | <=0.76       | >159                 | <=0.76       |
| Low physical activity (score 1 if answers yes to all three questions)                    | In the last three months, have you:                                                 |              |                      |              |
|                                                                                          | Performed no weight-bearing physical activity                                       |              | Yes                  | No           |
|                                                                                          | Spent more than 4 hours/ day sitting                                                |              | Yes                  | No           |
|                                                                                          | Been for a short walk once/ month or less frequently                                |              | Yes                  | No           |

Total score:

|    |
|----|
| /5 |
|----|

Frailty Index

If adapted from a validated index, please specify which: \_\_\_\_\_

Frailty index: \_\_\_\_\_

Geriatric Depression Scale – 15 (GDS-15)

Please ask the participants the following questions, and ask them to answer yes or know to each question. Please circle their responses.

|                                                                         |          |
|-------------------------------------------------------------------------|----------|
| 1) Are you basically satisfied with your life?                          | Yes      |
|                                                                         | No (+1)  |
| 2) Have you dropped many of your activities and interests?              | Yes (+1) |
|                                                                         | No       |
| 3) Do you feel that your life is empty?                                 | Yes (+1) |
|                                                                         | No       |
| 4) Do you often get bored?                                              | Yes (+1) |
|                                                                         | No       |
| 5) Are you in good spirits most of the time?                            | Yes      |
|                                                                         | No (+1)  |
| 6) Are you afraid that something bad is going to happen to you?         | Yes (+1) |
|                                                                         | No       |
| 7) Do you feel happy most of the time?                                  | Yes      |
|                                                                         | No (+1)  |
| 8) Do you often feel helpless?                                          | Yes (+1) |
|                                                                         | No       |
| 9) Do you prefer to stay at home, rather than go out and do new things? | Yes (+1) |
|                                                                         | No       |
| 10) Do you feel you have more problems with memory than most?           | Yes (+1) |
|                                                                         | No       |
| 11) Do you think it is wonderful to be alive?                           | Yes      |
|                                                                         | No (+1)  |
| 12) Do you feel pretty worthless the way you are now?                   | Yes (+1) |
|                                                                         | No       |
| 13) Do you feel full of energy?                                         | Yes      |
|                                                                         | No (+1)  |
| 14) Do you feel that your situation is hopeless?                        | Yes (+1) |
|                                                                         | No       |
| 15) Do you think that most people are better off than you are?          | Yes (+1) |
|                                                                         | No       |

Total score:

**/15**

0-4: Normal

5-9: Mild depressive symptoms

10-15: More severe depressive symptoms

Template case report form – Geriatric medicine extended dataset V1.0

Mini-Nutritional Assessment

Circle the most appropriate responses. If only screening to be performed, only white sections need be included. To extend to full assessment grey sections should be included.

|                                                                                                                                  | Options                                                                                                                                                                                                   | Points     |     |
|----------------------------------------------------------------------------------------------------------------------------------|-----------------------------------------------------------------------------------------------------------------------------------------------------------------------------------------------------------|------------|-----|
| Has food intake declined over the past 3 months due to loss of appetite, digestive problems, chewing or swallowing difficulties? | Severe decrease                                                                                                                                                                                           | 0          |     |
|                                                                                                                                  | Moderate decrease                                                                                                                                                                                         | 1          |     |
|                                                                                                                                  | No decrease                                                                                                                                                                                               | 2          |     |
| Weight loss during the last 3 months                                                                                             | > 3kg                                                                                                                                                                                                     | 0          |     |
|                                                                                                                                  | Does not know                                                                                                                                                                                             | 1          |     |
|                                                                                                                                  | 1-3kg                                                                                                                                                                                                     | 2          |     |
|                                                                                                                                  | No weight loss                                                                                                                                                                                            | 3          |     |
| Mobility                                                                                                                         | Bed or chair bound                                                                                                                                                                                        | 0          |     |
|                                                                                                                                  | Able to get out of bed/ chair but does not go out                                                                                                                                                         | 1          |     |
|                                                                                                                                  | Goes out                                                                                                                                                                                                  | 2          |     |
| Have you suffered psychological stress or acute disease in the past 3 months?                                                    | Yes                                                                                                                                                                                                       | 0          |     |
|                                                                                                                                  | No                                                                                                                                                                                                        | 2          |     |
| Neuropsychological problems                                                                                                      | Severe dementia or depression                                                                                                                                                                             | 0          |     |
|                                                                                                                                  | Mild dementia                                                                                                                                                                                             | 1          |     |
|                                                                                                                                  | No psychological problems                                                                                                                                                                                 | 2          |     |
| Body Mass Index (BMI)                                                                                                            | < 19                                                                                                                                                                                                      | 0          |     |
|                                                                                                                                  | 19 to less than 21                                                                                                                                                                                        | 1          |     |
|                                                                                                                                  | 21 to less than 23                                                                                                                                                                                        | 2          |     |
|                                                                                                                                  | >= 23                                                                                                                                                                                                     | 3          |     |
| Lives in own home (not care home)                                                                                                | No                                                                                                                                                                                                        | 0          |     |
|                                                                                                                                  | Yes                                                                                                                                                                                                       | 1          |     |
| Takes more than 3 prescription drugs per day                                                                                     | Yes                                                                                                                                                                                                       | 0          |     |
|                                                                                                                                  | No                                                                                                                                                                                                        | 1          |     |
| Pressure sores or skin ulcers                                                                                                    | Yes                                                                                                                                                                                                       | 0          |     |
|                                                                                                                                  | No                                                                                                                                                                                                        | 1          |     |
| How many full meals does the patient eat daily?                                                                                  | 1 meal                                                                                                                                                                                                    | 0          |     |
|                                                                                                                                  | 2 meals                                                                                                                                                                                                   | 1          |     |
|                                                                                                                                  | 3 meals                                                                                                                                                                                                   | 2          |     |
| Selected consumption markers for protein intake                                                                                  | <ul style="list-style-type: none"> <li>• At least one serving of dairy products per day</li> <li>• Two or more servings of legumes or eggs per day</li> <li>• Meat, fish, or poultry every day</li> </ul> | 0 or 1 yes | 0.0 |
|                                                                                                                                  |                                                                                                                                                                                                           | 2 yes      | 0.5 |
|                                                                                                                                  |                                                                                                                                                                                                           | 3 yes      | 1.0 |
| Consumes two or more servings of fruit or vegetables per day?                                                                    | No                                                                                                                                                                                                        | 0          |     |
|                                                                                                                                  | Yes                                                                                                                                                                                                       | 1          |     |
| How much fluid (water, juice, coffee, tea milk ....) is consumed per day?                                                        | Less than 3 cups                                                                                                                                                                                          | 0.0        |     |
|                                                                                                                                  | 3 to 5 cups                                                                                                                                                                                               | 0.5        |     |
|                                                                                                                                  | More than 5 cups                                                                                                                                                                                          | 1.0        |     |
| Mode of feeding                                                                                                                  | Unable to eat without assistance                                                                                                                                                                          | 0          |     |
|                                                                                                                                  | Self-fed with some difficulty                                                                                                                                                                             | 1          |     |
|                                                                                                                                  | Self-fed with no difficulty                                                                                                                                                                               | 2          |     |
| Self-view of nutritional status                                                                                                  | Views self as being malnourished                                                                                                                                                                          | 0          |     |
|                                                                                                                                  | Is uncertain of nutritional state                                                                                                                                                                         | 1          |     |
|                                                                                                                                  | Views self as having no nutritional problem                                                                                                                                                               | 2          |     |
|                                                                                                                                  | Not as good                                                                                                                                                                                               | 0.0        |     |
|                                                                                                                                  | Does not know                                                                                                                                                                                             | 0.5        |     |



Template case report form – Geriatric medicine extended dataset V1.0

|                                                                                                         |                 |     |
|---------------------------------------------------------------------------------------------------------|-----------------|-----|
| In comparison with other people of the same age, how does the patient consider his / her health status? | As good         | 1.0 |
|                                                                                                         | Better          | 2.0 |
| Mid-arm circumference (MAC) in cm<br>Specify: _____                                                     | Less than 21    | 0.0 |
|                                                                                                         | 21 to 22        | 0.5 |
|                                                                                                         | Greater than 22 | 1.0 |
| Calf circumference (CC) – widest part of the calf in cm Specify: _____                                  | Less than 31    | 0   |
|                                                                                                         | 31 or greater   | 1   |

Total score:

|     |
|-----|
| /30 |
|-----|

Screening (short form):

0-7: Malnourished      8-11: At risk of malnutrition      12-14: Normal nutritional status

Assessment (full form):

0-16.5: Malnourished      17-23.5: At risk of malnutrition      24-30: Normal nutritional status
